# Supplementary material for: Educational attainment of adolescents treated in psychiatric inpatient care: a register study over 3 decades
Source: Springer Nature journal article supplement (doi:10.1007/s00787-022-02052-0), 2022-08-06
Supplement: MOESM1 [file 23342660]

| <b>Supplementary Table 1:</b>                                                                                                                                                                         |                      |
|-------------------------------------------------------------------------------------------------------------------------------------------------------------------------------------------------------|----------------------|
| No educational information available in 2014 (missing data) among those alive and 20-49 years old in 2014 and having psychiatric (F), neurological (G) or social reasons diagnosis in index admission |                      |
| <b>All</b>                                                                                                                                                                                            | 1.3 % (197/14632)    |
| <b>Sex:</b>                                                                                                                                                                                           |                      |
| Male                                                                                                                                                                                                  | 1.1 %<br>(64/5667)   |
| Female                                                                                                                                                                                                | 1.5 %<br>(133/8965)  |
| p (phi) vs sexes                                                                                                                                                                                      | 0.07<br>(0.02)       |
| <b>Age at inpatient care:</b>                                                                                                                                                                         |                      |
| 13-14 yrs                                                                                                                                                                                             | 1.3 %<br>(53/4172)   |
| 15-17 yrs                                                                                                                                                                                             | 1.4 %<br>(144/10316) |
| p (phi) vs age groups                                                                                                                                                                                 | 0.61<br>(0.004)      |
| <b>Age in 2014:</b>                                                                                                                                                                                   |                      |
| 20-29 yrs                                                                                                                                                                                             | 0.9 %<br>(83/8995)   |
| 30-39 yrs                                                                                                                                                                                             | 2.0 %<br>(72/3582)   |
| 40-49 yrs                                                                                                                                                                                             | 2.1 %<br>(42/1983)   |
| p (Cramer's V) vs. age groups                                                                                                                                                                         | <0.001<br>(0.05)     |
| <b>Primary diagnosis in first inpatient care:</b>                                                                                                                                                     |                      |
| Organic, intellectual disability and developmental (F00-09, F70-79, F80-89, G-diagnoses)                                                                                                              | 1.2 %<br>(5/420)     |
| Schizophrenia group (F20-29)                                                                                                                                                                          | 0.9 %<br>(15/1677)   |
| Mood disorders (F30-39)                                                                                                                                                                               | 1.3 %<br>(55/4293)   |
| Anxiety disorders (F40-48)                                                                                                                                                                            | 1.5 %<br>(42/2708)   |
| Behavioural syndromes associated with physiological disturbances and physical factors                                                                                                                 | 2.6 %<br>(20/782)    |
| Externalizing disorders (F10-19, F60-69, F90-92)                                                                                                                                                      | 1.3 %<br>(40/3082)   |
| Emotional disorders of childhood (F93-99)                                                                                                                                                             | 0.9 %<br>(10/1066)   |
| Social reasons (Z-codes)                                                                                                                                                                              | 1.8 %<br>(10/562)    |
| p (Cramer's V) vs diagnosis groups                                                                                                                                                                    | <0.05<br>(0.03)      |
