# Supplementary material for: Educational attainment of adolescents treated in psychiatric inpatient care: a register study over 3 decades
Source: Springer Nature journal article supplement (doi:10.1007/s00787-022-02052-0), 2022-08-06
Supplement: MOESM2 [file 23342660]

| Supplementary table 2: Highest school education completed in study population compared to that of whole population by age groups , % (n) (with p-values and Cohen’s h effect sizes) |                               |                                |                  |         |                              |                                |                  |         |                              |                                |                  |               |                             |                               |                  |
|-------------------------------------------------------------------------------------------------------------------------------------------------------------------------------------|-------------------------------|--------------------------------|------------------|---------|------------------------------|--------------------------------|------------------|---------|------------------------------|--------------------------------|------------------|---------------|-----------------------------|-------------------------------|------------------|
| 20-29 y                                                                                                                                                                             |                               |                                |                  | 30-39 y |                              |                                |                  | 40-49 y |                              |                                |                  | All (20-49y ) |                             |                               |                  |
| Males                                                                                                                                                                               | Study population<br>(N 3109)  | Whole population<br>(N 348782) | p-values<br>(h)  |         | Study population<br>(N 1507) | Whole population<br>(N 360229) | p-values<br>(h)  |         | Study population<br>(N 987)  | Whole population<br>(N 342288) | p-values<br>(h)  |               | Study population<br>(5603)  | Whole population<br>(1051299) | p-values<br>(h)  |
| Comprehensive school only                                                                                                                                                           | 60.6 %<br>(1883)              | 19.0 %<br>(66346)              | <0.001<br>(0.89) |         | 56.9 %<br>(857)              | 17.6 %<br>(63492)              | <0.001<br>(0.84) |         | 61.1 %<br>(603)              | 17.9 %<br>(61314)              | <0.001<br>(0.92) |               | 59.7 %<br>(3343)            | 18.2 %<br>(191152)            | <0.001<br>(0.8)  |
| Upper secondary education                                                                                                                                                           | 37.4 %<br>(1162)              | 67.4 %<br>(235069)             | <0.001<br>(0.61) |         | 38.0 %<br>(572)              | 48.2 %<br>(173659)             | <0.001<br>(0.21) |         | 32.1 %<br>(317)              | 46.5 %<br>(159285)             | <0.001<br>(0.3)  |               | 36.6 %<br>(2051)            | 54.0 %<br>(568013)            | <0.001<br>(0.35) |
| Tertiary education                                                                                                                                                                  | 2.1 %<br>(64)                 | 13.6 %<br>(47367)              | <0.001<br>(0.46) |         | 5.2 %<br>(78)                | 34.2 %<br>(123078)             | <0.001<br>(0.79) |         | 6.8 %<br>(67)                | 35.6 %<br>(121689)             | <0.001<br>(0.75) |               | 7.1 %<br>(209)              | 35.2 %<br>(292134)            | <0.001<br>(0.73) |
| Females                                                                                                                                                                             | Study population<br>(N 5803)  | Whole population<br>(N 332869) | p-values<br>(h)  |         | Study population<br>(N 2075) | Whole population<br>(N 339857) | p-values<br>(h)  |         | Study population<br>(N 954)  | Whole population<br>(N 331708) | p-values<br>(h)  |               | Study population<br>(8832)) | Whole population<br>(1004164) | p-values<br>(h)  |
| Comprehensive school only                                                                                                                                                           | 47.2 %<br>(2739)              | 14.9 %<br>(49470)              | <0.001<br>(0.72) |         | 36.2 %<br>(751)              | 10.4 %<br>(35320)              | <0.001<br>(0.63) |         | 41.0 %<br>(391)              | 10.4 %<br>(34644)              | <0.001<br>(0.73) |               | 43.9 %<br>(3881)            | 11.9 %<br>(119434)            | <0.001<br>(0.74) |
| Upper secondary education                                                                                                                                                           | 47.5 %<br>(2755)              | 60.8 %<br>(202432)             | <0.001<br>(0.27) |         | 47.8 %<br>(991)              | 37.5 %<br>(127194)             | <0.001<br>(0.21) |         | 41.1 %<br>(392)              | 37.2 %<br>(123246)             | 0.013<br>(0.08)  |               | 46.9 %<br>(4138)            | 45.1 %<br>(452872)            | <0.001<br>(0.04) |
| Tertiary education                                                                                                                                                                  | 5.3 %<br>(309)                | 24.3 %<br>(80967)              | <0.001<br>(0.57) |         | 16.0 %<br>(333)              | 52.1 %<br>(177073)             | <0.001<br>(0.79) |         | 17.9 %<br>(171)              | 52.4 %<br>(173818)             | <0.001<br>(0.75) |               | 9.2 %<br>(813)              | 43.0 %<br>(431858)            | <0.001<br>(0.81) |
| All                                                                                                                                                                                 | Study population<br>(N 8912 ) | Whole population<br>(N 681651) | p-values<br>(h)  |         | Study population<br>(N 3582) | Whole population<br>(N 699816) | p-values<br>(h)  |         | Study population<br>(N 1941) | Whole population<br>(N 673996) | p-values<br>(h)  |               | Study population<br>(14435) | Whole population<br>(2055463) | p-values(<br>(h) |
| Comprehensive school only                                                                                                                                                           | 51.9 %<br>(4622)              | 17.0 %<br>(115816)             | <0.001<br>(0.76) |         | 44.9 %<br>(1608)             | 14.1 %<br>(98812)              | <0.001<br>(0.7)  |         | 51.2 %<br>(994)              | 14.2 %<br>(34644)              | <0.001<br>(0.82) |               | 50.0 %<br>(7224)            | 15.1 %<br>(310586)            | <0.001<br>(0.77) |
| Upper secondary education                                                                                                                                                           | 43.9 %<br>(3917)              | 64.2 %<br>(437501)             | <0.001<br>(0.41) |         | 43.6 %<br>(1563)             | 43.0 %<br>(300853)             | 0.47<br>(0.01)   |         | 36.5 %<br>(709)              | 41.9 %<br>(123246)             | <0.001<br>(0.11) |               | 42.9 %<br>(6189)            | 49.7 %<br>(1020885)           | <0.001<br>(0.14) |
| Tertiary education                                                                                                                                                                  | 4.2 %<br>(373)                | 18.8 %<br>(128334)             | <0.001<br>(0.48) |         | 11.5 %<br>(411)              | 42.9 %<br>(300151)             | <0.001<br>(0.74) |         | 12.3 %<br>(238)              | 43.8 %<br>(173818)             | <0.001<br>(0.73) |               | 7.1 %<br>(1022)             | 35.2 %<br>(723992)            | <0.001<br>(0.73) |
